# Supplementary material
Source: publisher site journal article supplement (https://www.degruyterbrill.com/publication/isbn/9783839433959/downloadAsset/9783839433959_Leseprobe.pdf)
Supplement: Supplementary file 1 [file 9783839433959_Leseprobe.pdf]

Zekirija Sejdini (Hg.)

---

# Islamische Theologie und Religionspädagogik in Bewegung

---

Neue Ansätze in Europa

**Aus:**

*Zekirija Sejdini (Hg.)*

## **Islamische Theologie und Religionspädagogik in Bewegung** **Neue Ansätze in Europa**

September 2016, 182 Seiten, kart., 24,99 €, ISBN 978-3-8376-3395-5

Welche Merkmale muss eine gegenwartsbezogene islamische Theologie und Religionspädagogik im deutschen und im europäischen Kontext aufweisen, um sowohl den Bedürfnissen der in einem säkularen Umfeld lebenden europäischen Muslim\_innen gerecht zu werden, als auch zur Profilierung der islamischen Theologie und Religionspädagogik im europäischen Kontext beitragen zu können?

Dieser Frage, die sich vor dem Hintergrund der Gründung mehrerer islamisch-theologischer Zentren an deutschsprachigen Universitäten stellt, gehen die Beiträger\_innen aus der Perspektive unterschiedlicher Fachgebiete nach und tragen damit auch zu einer Reflexion der aktuellen Islam-Debatte bei.

**Zekirija Sejdini (Dr.)**, geb. 1972, ist Professor für Islamische Religionspädagogik an der Universität Innsbruck.

Weitere Informationen und Bestellung unter:

[www.transcript-verlag.de/978-3-8376-3395-5](http://www.transcript-verlag.de/978-3-8376-3395-5)

# Inhalt

---

**Vorwort** | 7

**Einleitung** | 9

Zekirija Sejdini

**Zwischen Gewissheit und Kontingenz** | 15

Auf dem Weg zu einem neuen Verständnis von islamischer  
Theologie und Religionspädagogik im europäischen Kontext

Ednan Aslan

**Pluralität als Wille Gottes** | 33

Sebastian Günther

**Bildungsauffassungen klassischer muslimischer Gelehrter** | 51

Von Abu Hanifa bis Ibn Khaldun (8.-15. Jh.)

Ömer Özsoy

**Dekontextualisierung des Korans: moderne Koraninterpretationen  
oder Konstruktion moderner Korane** | 73

Rabeya Müller

**Der Koran im Unterricht: Chance für Geschlechtergerechtigkeit  
oder Anleitung zum Extremismus?** | 91

Yaşar Sarıkaya

**Der Hadith im islamischen Religionsunterricht:  
eine religionspädagogische Herausforderung** | 101

Matthias Scharer

**Eine islamische Theologie und Religionspädagogik,  
»mit der wir leben können« | 119**

Kommentar zur Ringvorlesung aus  
katholisch-religionspädagogischer Perspektive

Martina Kraml

**Religionsdidaktik in der Spannung zwischen öffentlichem  
und religionsgemeinschaftlichem Bildungsauftrag | 133**

Fatima Çavis

**Islamische Frauenkatechismen in der religiösen  
Erwachsenenbildung: eine kritische Analyse | 147**

Mehmet Hilmi Tuna

**Ansätze im islamischen Religionsunterricht für neue  
Entwicklungen in Theologie und Religionspädagogik | 163**

**Autorinnen und Autoren | 177**

# Einleitung

---

ZEKIRIJA SEJDINI

Obwohl die islamische Präsenz in Europa eine lange Tradition hat und daher zu Recht angenommen werden kann, dass der »Beheimatungsprozess« des Islams in Europa, wenn auch nicht abgeschlossen, so doch in einem fortgeschrittenen Stadium ist, zeigen die jüngsten Entwicklungen, dass zumindest bei einem Teil der Gesellschaft – der gleichwohl nicht zu unterschätzen ist – der Islam mehr denn je als Fremdkörper betrachtet wird.

Die Diskussionen über die Zugehörigkeit des Islams zu Europa lassen deutlich erkennen, dass nicht nur der erhoffte und notwendige Fortschritt im »Beheimatungsprozess« des Islams in Europa ausgeblieben ist, sondern dass im Gegenteil der Drang einer öffentlichen Abgrenzung vom Islam, speziell im politischen Kontext, immer stärker wird.

Diese besorgniserregenden Entwicklungen haben naturgemäß verschiedene Ursachen, die in einer Vielzahl von Bereichen zu suchen sind. Dazu gehören neben der andauernden Finanzkrise auch die instabile Weltpolitik, die ständigen Terroranschläge, die steigende Anzahl der Asylsuchenden aus den Kriegsgebieten wie Syrien, eine rechtspopulistische Politik, die einseitigen und undifferenzierten Medienberichte über den Islam, aber auch das Fehlen von neuen islamischen theologischen Ansätzen im europäischen Kontext.

Auch wenn letzterer Umstand im Vergleich zu den anderen Faktoren eine eher geringe Rolle bei der Entstehung dieser Aversion gegenüber dem Islam spielt, darf er dennoch nicht völlig außer Acht gelassen werden. Denn nicht selten bilden unreflektierte theologische Positionen die Grundlage von Diskussionen, die im weiteren Verlauf durch populistische Parteien und pauschalisierende Medienberichte generalisiert und auf den Islam insgesamt ausgedehnt werden.

Einer der Gründe, warum trotz der langen Geschichte des Islams in Europa eigene theologische und religionspädagogische Ansätze lange gefehlt haben und teilweise immer noch fehlen, ist die bis vor Kurzem nicht vorhandene Verankerung der islamischen Theologie an den europäischen Universitäten. Der Mangel an Möglichkeiten einer akademischen Auseinandersetzung innerhalb europäischer Universitäten hat die Entstehung von neuen islamischen theologischen und religionspädagogischen Positionen unter Berücksichtigung des säkularen, demokratischen und pluralistischen europäischen Kontexts verhindert und dazu geführt, dass die europäischen Muslime in Sachen Befriedigung ihrer spirituellen Bedürfnisse nach wie vor von der Betreuung durch ihre Herkunftsländer abhängig sind. Erst durch die Etablierung theologischer Zentren an österreichischen und deutschen Universitäten in den letzten Jahren ist es einigermaßen gelungen, verschiedene gesellschaftspolitisch relevante islamische Themen auch aus einer innerislamisch verankerten universitären Perspektive zu beleuchten.

Die nunmehrige Aufgabe besteht darin, ausgehend von der reichen islamischen theologischen Tradition, theologische Positionen zu erarbeiten, die sowohl den gegenwärtigen wissenschaftlichen Diskurs als auch den durch Säkularität, Demokratie, Rechtsstaatlichkeit und weltanschaulich-religiöse Pluralität geprägten europäischen Kontext berücksichtigen und ihm gerecht werden. Vor diesem Hintergrund soll auch diese Publikation verstanden werden. Die verschiedenen Beiträge, die zum Teil aus der Innen- und zum Teil aus der Außenperspektive verfasst worden sind, sollen zur Entstehung von neuen islamischen theologischen und religionspädagogischen Ansätzen im europäischen Kontext beitragen.

Dieses Buch beinhaltet zehn Beiträge, die diese Problematik aus verschiedenen Perspektiven beleuchten.

Der erste Beitrag, der zugleich die Grundlage der an der Universität Innsbruck gehaltenen Antrittsvorlesung des Herausgebers bildete, widmet sich explizit der Problematik der Verankerung der islamischen Theologie und Religionspädagogik im gegenwärtigen Kontext. Dabei wird der Versuch unternommen, die fundamentalen Probleme einer im Werden begriffenen islamischen Theologie und Religionspädagogik aufzuzeigen und Lösungsansätze anzubieten. In diesem Zusammenhang wird der Frage nachgegangen, welcher Zugang zur Anthropologie, zur Offenbarung und zum Kontext aus islamischer Perspektive vonnöten ist, um zu theologischen und religionspädagogischen Ansätzen zu gelangen, die den gegenwärtigen Bedürfnissen der Musliminnen und Muslime, aber auch der Gesellschaft insgesamt entsprechen. Besonders hingewiesen wird darauf, dass ohne eine grundsätzliche Auseinandersetzung mit bestimmten theo-

logischen Annahmen die Entwicklung neuer theologischer und religionspädagogischer Ansätze nicht möglich sein wird.

Der Frage nach Inklusion und Exklusion – eine der entscheidenden Fragen im religiösen Diskurs – widmet sich Ednan Aslan. In seinem Beitrag analysiert er die Möglichkeiten einer theologischen Begründung der religiösen Pluralität aus muslimischer Perspektive. In diesem Zusammenhang geht es um die Eruiierung der Voraussetzungen einer inklusivistischen Haltung gegenüber anderen Religionen innerhalb der islamischen Theologie. Dabei steht die Ausweitung der Bedeutung von zentralen islamischen Begriffen, wie zum Beispiel des Begriffs Muslim, von den Anhängern des Propheten Muhammad auf alle Gott ergebenden Menschen innerhalb der monotheistischen Tradition im Zentrum dieser Überlegungen. Damit sollen stabile und theologisch begründbare Grundlagen für ein respektvolles Miteinander im gegenwärtigen pluralen Kontext geliefert werden.

Dass neue Ansätze nicht unbedingt der Tradition widersprechen müssen, sondern auf dieser aufbauend neu interpretiert werden können, zeigt auf beeindruckende Weise der Beitrag von Sebastian Günther, in dem die Bildungsauffassungen der klassischen muslimischen Gelehrten zwischen dem achten und fünfzehnten Jahrhundert behandelt werden. Anhand der Analyse einiger Aussagen des Korans und der Tradition des Propheten Muhammad, aber auch der Meinungen von berühmten klassischen muslimischen Gelehrten werden verschiedene pädagogische Elemente benannt, die für die Weiterentwicklung der religiösen Bildung im islamischen Kontext von enormer Bedeutung sein können. In diesem Zusammenhang werden sowohl Inhalte als auch Verfasser klassischer islamischer pädagogischer Schriften ausführlich dargestellt. Dabei werden sowohl von großen muslimischen Rechtgelehrten wie Abu Hanifa als auch von Literaten, Mystikern und Philosophen wie Dschahiz, Ghazali und Ibn Ruschd entworfene religionspädagogische Konzepte analysiert und dargestellt.

Eine ausführliche Auseinandersetzung mit modernen Zugängen zum Koran liefert Ömer Özsoy. In dieser wird vor allem die Frage erörtert, ob – und wenn ja, wie – die Aussagen des Korans – als ursprünglich auf eine vollkommen andere Lebenswelt gerichtet – auch heute noch Gültigkeit haben können. In seinem Beitrag liefert der Autor zudem eine Analyse der geschichtlichen Hintergründe der anachronistischen Annäherung an den Koran und zeigt einige rezeptionsgeschichtliche Brüche in der Denktradition auf.

Nach dieser allgemeinen Darstellung der pädagogischen Ansätze in den islamischen Quellen und bei muslimischen Gelehrten folgt der Beitrag von Rabeya Müller, dessen Fokus auf dem Umgang mit der primären und wichtigsten Quelle des Islams, dem Koran, im Rahmen des islamischen Religionsunterrichts liegt. Dabei zeigt die Autorin anhand konkreter Beispiele die ambivalente Hal-

tung des Korans bezüglich verschiedener Themen und damit auch die Notwendigkeit eines angemessenen Zugangs zu dieser wichtigen Quelle, um missverständliche Interpretationen zu vermeiden.

Den angemessenen Zugang zu der zweiten wichtigen islamischen Quelle im Rahmen des islamischen Religionsunterrichts, der Tradition des Propheten Muhammad, behandelt der Beitrag von Yaşar Sarıkaya. Neben den Arten und der Bedeutung der prophetischen Überlieferung wird darin auch auf die grundsätzlichen Probleme eingegangen, die bei der Anwendung dieser wichtigen Quelle im Religionsunterricht auftauchen. Der Beitrag liefert wertvolle didaktische und methodische Anregungen zum Umgang mit dem umfangreichen Material.

Neben den Beiträgen, die aus einer islamischen Binnenperspektive verfasst wurden, bringen die Ausführungen von Matthias Scharer, unter Bezugnahme auf die Vorträge der Ringvorlesung, eine religionspädagogische und religionsdidaktische Außenperspektive ein. Sein Text beschäftigt sich grundsätzlich mit der Darstellung und Analyse der Entwicklungen im Bereich der islamischen Theologie und Religionspädagogik aus Sicht eines katholischen Theologen und Religionspädagogen. Dabei werden sowohl die Gemeinsamkeiten als auch die Unterschiede in beiden Religionen analysiert und wichtige Verknüpfungen aufgezeigt.

Die Spannung zwischen öffentlichem und religionsgemeinschaftlichem Bildungsauftrag thematisiert Martina Kraml. Diese Spannung, wie immer sie gedacht wird, nimmt entscheidenden Einfluss auf die Religionspädagogik und Religionsdidaktik, insofern, als sie Konzepte religiöser Bildung hervorbringt, die pluralitätssensible religiöse Bildung auf konfessioneller Basis unterstützen oder aber verunmöglichen. Die Herausforderung besteht in der Anschlussfähigkeit an den säkularen Raum.

Die Stellung der Frau innerhalb der Religionen bildet einen wichtigen Themenbereich in den theologischen und religionspädagogischen Auseinandersetzungen fast aller Religionen. Auch die islamische Theologie und Religionspädagogik macht hier keine Ausnahme. Daher darf in einem Buch über neue islamische theologische und religionspädagogische Ansätze im europäischen Kontext das Thema Frau im Islam nicht fehlen. Ausgehend von der Bedeutung muslimischer Katechetik im traditionellen Verständnis von religiöser Bildung geht Fatima Çavis der Frage nach den Frauenbildern nach, die in den in der Türkei verwendeten Katechismen vermittelt werden. Dieser Beitrag, der auf den Analysen und Ergebnissen der von der Autorin verfassten Magisterarbeit gründet, zeigt auf unmissverständliche Art und Weise, dass das Frauenbild in der klassischen islamischen religiösen Bildung nicht unseren Wertvorstellungen entspricht und



daher ein wichtiger Themenbereich neuer theologischer und religionspädagogischer Reflexion sein muss.

So, wie das Frauenbild ein zentrales Thema bei der Konzipierung neuer theologischer und religionspädagogischer Ansätze im islamischen Kontext darstellt, kommt auch dem islamischen Religionsunterricht – als einer wichtigen Schnittstelle zwischen dem Staat und der islamischen Glaubensgemeinschaft – eine Schlüsselrolle bei der Formierung neuer theologischer und religionspädagogischer Ansätze zu. Im letzten Beitrag behandelt Mehmet Tuna, unter Heranziehung einer im Rahmen seiner Masterarbeit durchgeführten empirischen Studie, die Gründe für die Abmeldung vom islamischen Religionsunterricht in Österreich. Dieser Beitrag liefert unter anderem wichtige empirische Ergebnisse, die in den theoretischen Auseinandersetzungen um neue theologische und religionspädagogische Ansätze mitberücksichtigt werden müssen.

Jeder Beitrag in diesem Buch befasst sich mit einer besonderen Problematik im Bereich der islamischen Theologie und Religionspädagogik. Dabei unterscheiden sich sowohl die Themen als auch die Ansätze und die Perspektiven. Wichtig jedoch erscheint, dass sämtliche Beiträge im Hinblick darauf verfasst wurden, die Weiterentwicklung von neuen Ansätzen in der islamischen Theologie und Religionspädagogik im europäischen Kontext zu befördern.
